# Supplementary material for: A comparison of the network structure and inner dynamics of homogeneously and heterogeneously crosslinked PNIPAM microgels with high crosslinker content
Source: Royal Society of Chemistry journal article supplement (doi:10.1039/c8sm02141d), 2019-01-01
Supplement: c8sm02141d1.pdf [file c8sm02141d1.pdf]

## Electronic Supplementary Information

A comparison of the network structure and inner dynamics of homogeneously and heterogeneously crosslinked PNIPAM microgels with high crosslinker content

Judith Witte\*<sup>1</sup>, Tetyana Kyrey<sup>1,2,3</sup>, Jana Lutzki<sup>1</sup>, Anna Margarethe Dahl<sup>1</sup>, Judith Houston<sup>3</sup>, Aurel Radulescu<sup>3</sup>, Vitaliy Pipich<sup>3</sup>, Laura Stingaciu<sup>4</sup>, Matthias Kühnhammer<sup>2</sup>, Marcus U. Witt<sup>2</sup>, Regine von Klitzing<sup>2</sup>, Olaf Holderer<sup>3</sup> and Stefan Wellert<sup>1</sup>

<sup>1</sup>Institute of Chemistry, TU Berlin,  
Straße des 17. Juni 124, 10623 Berlin, Germany

<sup>2</sup>Institute of Physics, TU Darmstadt,  
Alarich-Weiss-Straße 10, 64287 Darmstadt, Germany

<sup>3</sup>Jülich Centre for Neutron Science JCNS,  
Forschungszentrum Jülich GmbH, Outstation at MLZ,  
Lichtenbergstraße 1, 85747 Garching, Germany

<sup>4</sup>NSCD Oak Ridge National Laboratory  
Oak Ridge, Tennessee 37831, United States

---

<sup>1</sup> Corresponding author: [judith.witte@tu-berlin.de](mailto:judith.witte@tu-berlin.de)

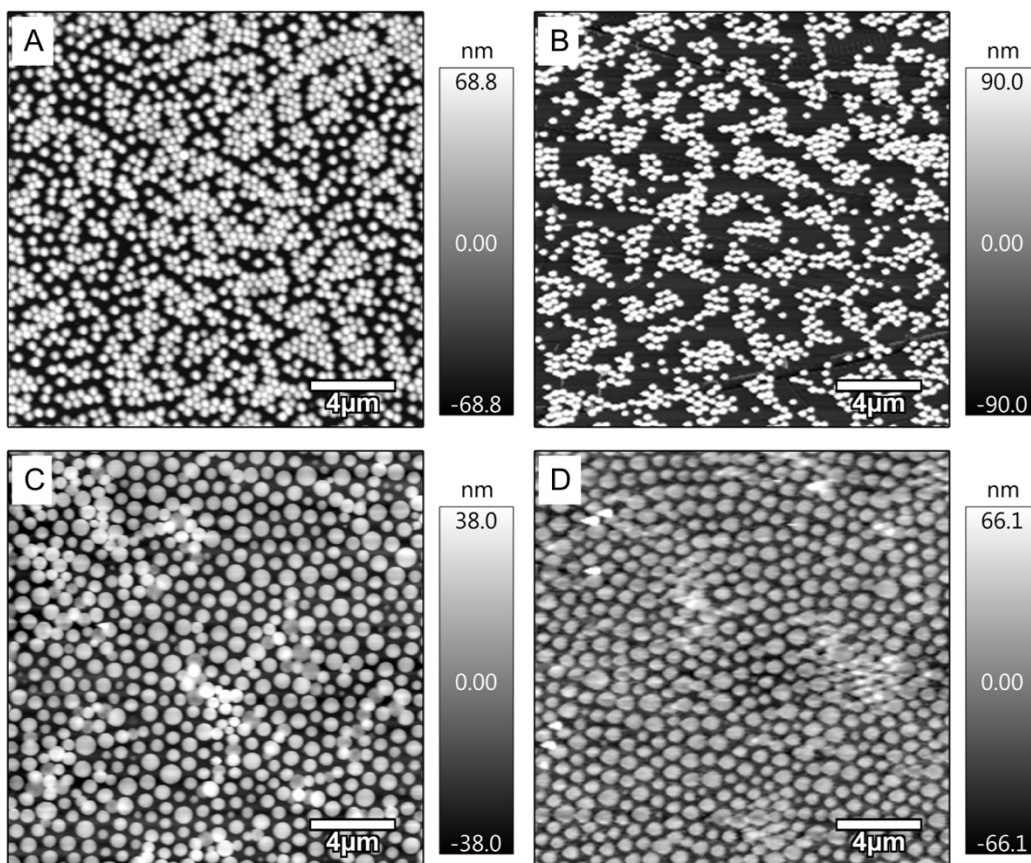

Figure S. 1: AFM images of A) HetMG10 under ambient conditions, B) HetMG10 swollen in  $H_2O$ , C) HomMG10 under ambient conditions and D) HomMG10 swollen in  $H_2O$ .

Table S. 1: Dry and swollen widths and heights of HetMG10 and HomMG10. Cross sections of 5 individual particles were analyzed and the standard deviation was calculated.

| Microgel | Width <sub>dry</sub> (nm) | Height <sub>dry</sub> (nm) | Width <sub>H<sub>2</sub>O</sub> (nm) | Height <sub>H<sub>2</sub>O</sub> (nm) |
|----------|---------------------------|----------------------------|--------------------------------------|---------------------------------------|
| HetMG10  | $626 \pm 57$              | $134 \pm 8$                | $650 \pm 45$                         | $237 \pm 15$                          |
| HomMG10  | $885 \pm 134$             | $48 \pm 1$                 | $1020 \pm 138$                       | $106 \pm 12$                          |

Images under ambient conditions were scanned in tapping mode with AC160TS cantilevers (Olympus). Images in  $H_2O$  were scanned with TR800PSA cantilevers (Olympus).

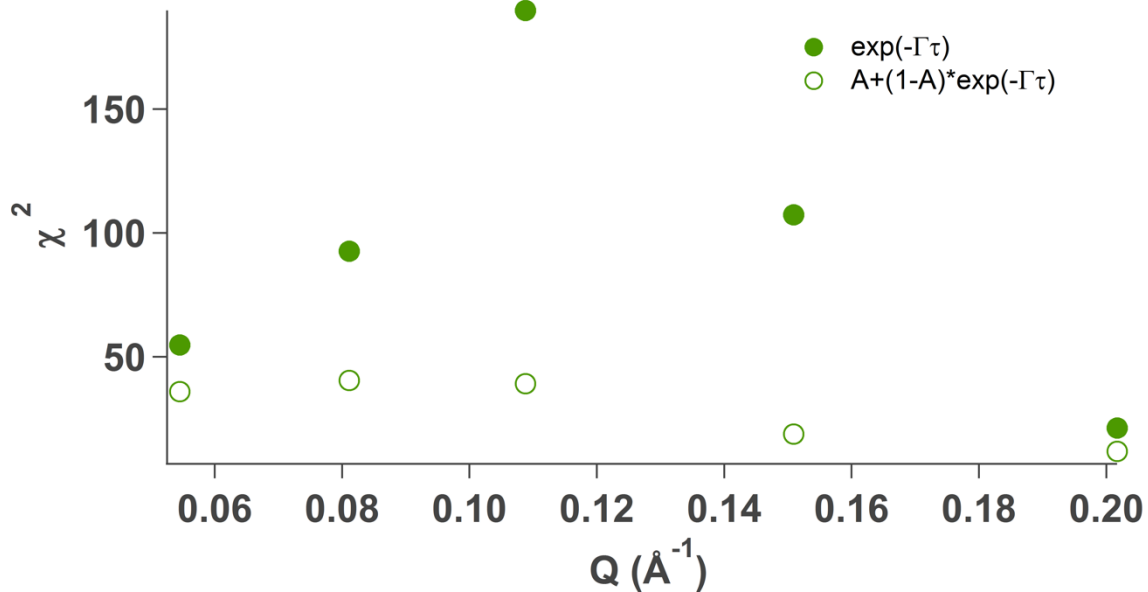

Figure S. 2:  $\chi^2$  for fits of the normalized intermediate scattering functions of HetMG10 with and without the elastic contribution.

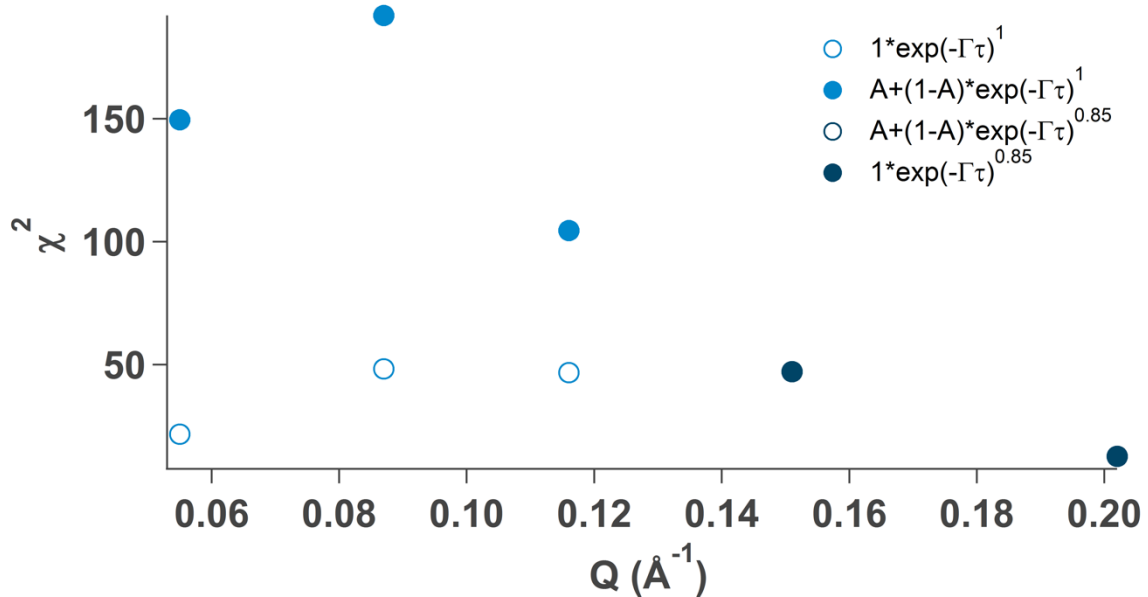

Figure S. 3:  $\chi^2$  for fits of the normalized intermediate scattering functions of HomMG10 with and without the elastic contribution.  $Q = 0.15 \text{ \AA}^{-1}$  and  $Q = 0.20 \text{ \AA}^{-1}$  were fitted with a stretched exponential with exponent  $\beta = 0.85$ .

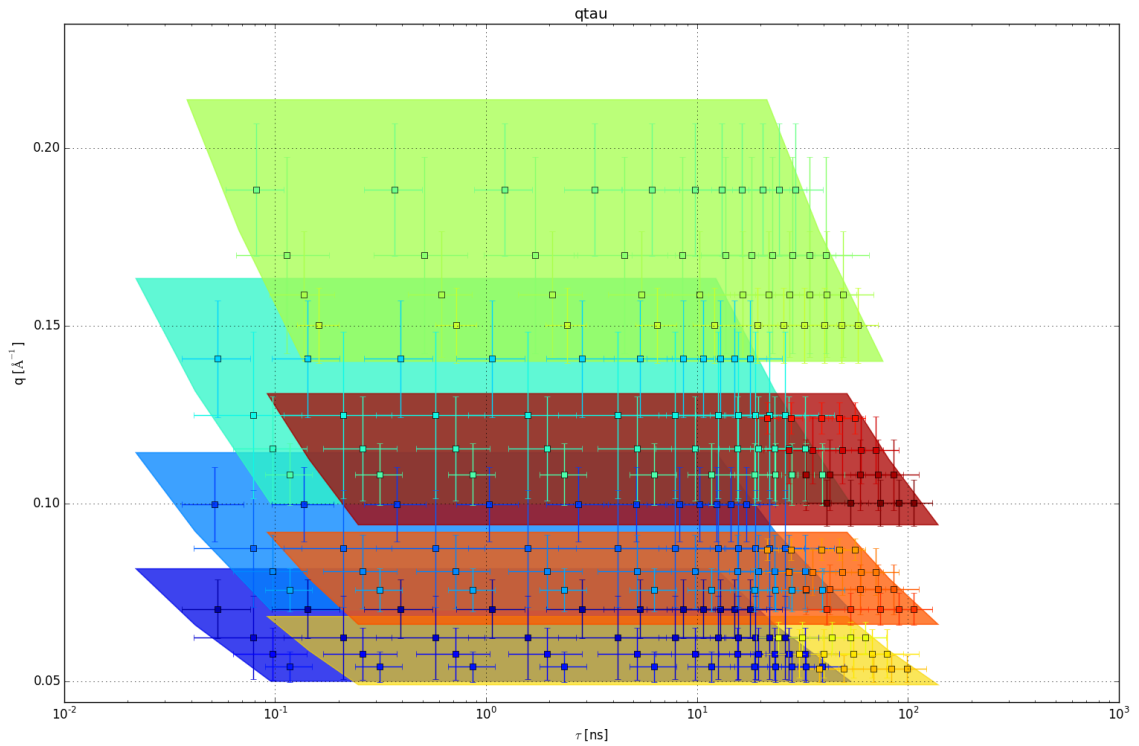

Figure S.4:  $Q$ - $\tau$  map for the measurements at the SNS-NSE at the spallation neutron source in Oak Ridge, TN.

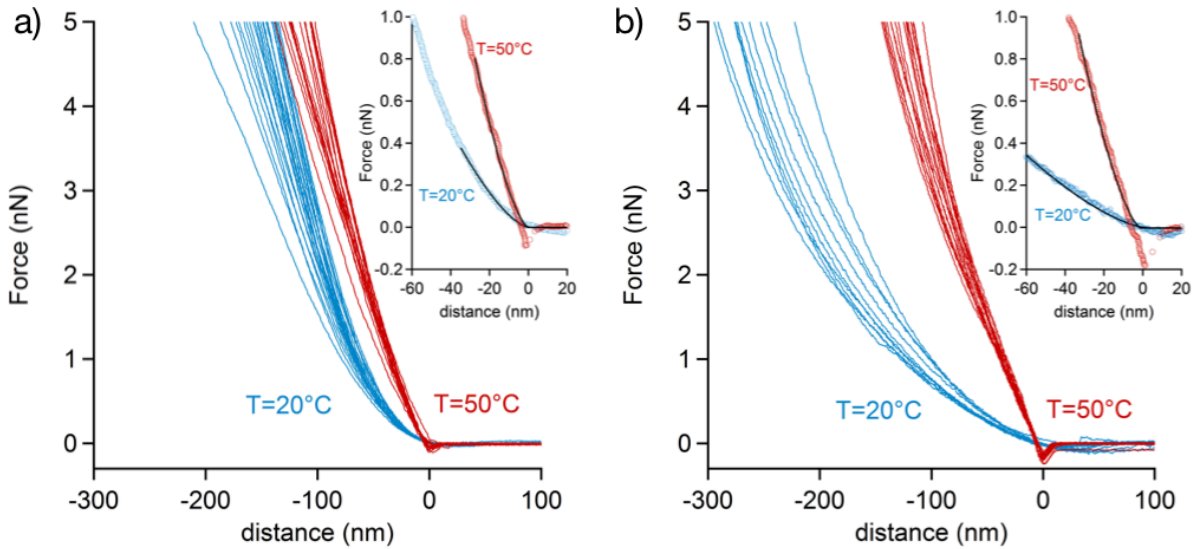

Figure S. 5: AFM force-distance curves for a)  $MG_{10}P$  and b)  $MG_{10}F$  at  $T = 20^\circ\text{C}$  (blue) and  $T = 50^\circ\text{C}$  (red). Insets show an exemplary fit according to the Hertz model (equation 1 in main text) at  $T = 20^\circ\text{C}$  (blue) and  $T = 50^\circ\text{C}$  (red). The positive indentation depth values were transferred into negative tip-sample-distances.

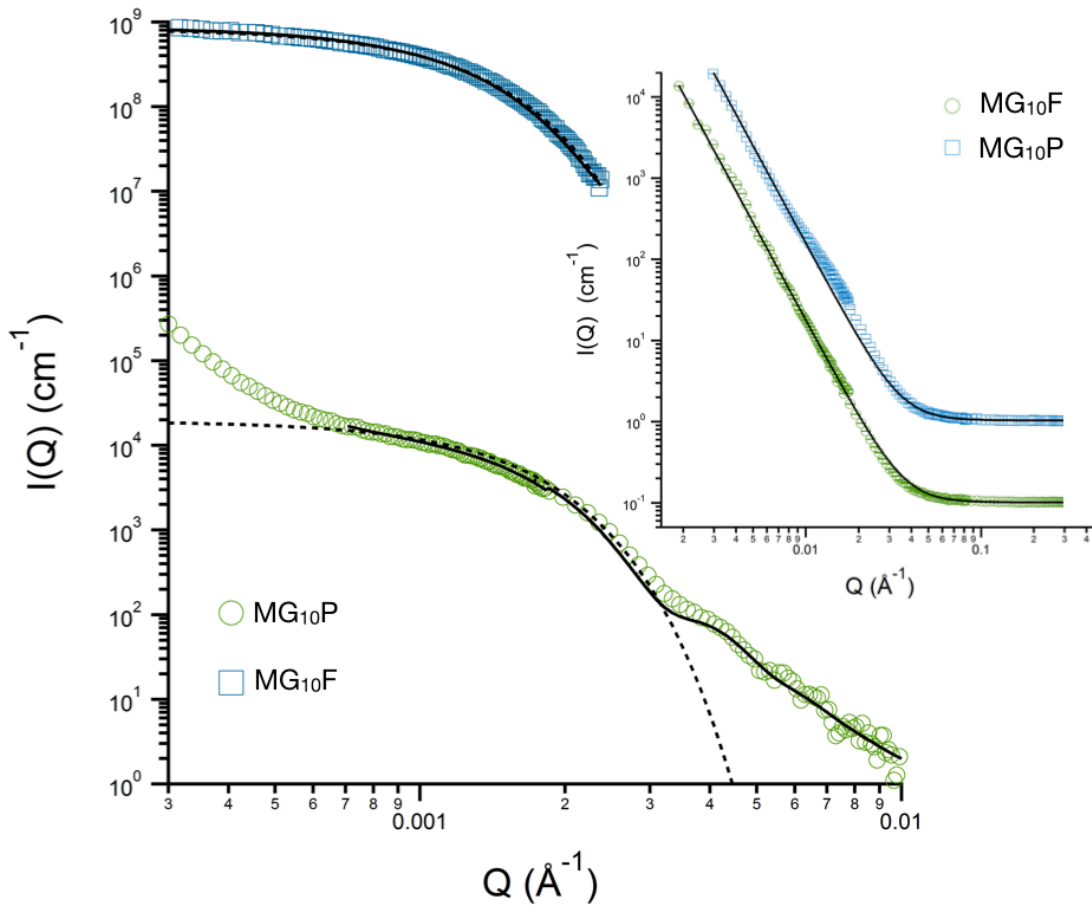

Figure S. 6: SANS curves of MG10P and MG10F measured at 50°C in a wide Q range. A Guinier analysis of the data yields the radius of gyration  $R_g$  at 50°C. The dashed line in the figure are the Guinier fits to the data. Solid lines are fits to the fuzzy sphere model. Results are given in Table 2 and 3 in section 4.4 of the paper. The inset shows the medium and high Q-range. For both samples, the intensity decreases in this range according to the Porod law,  $I \propto Q^{-4}$  until the incoherent background level is reached.

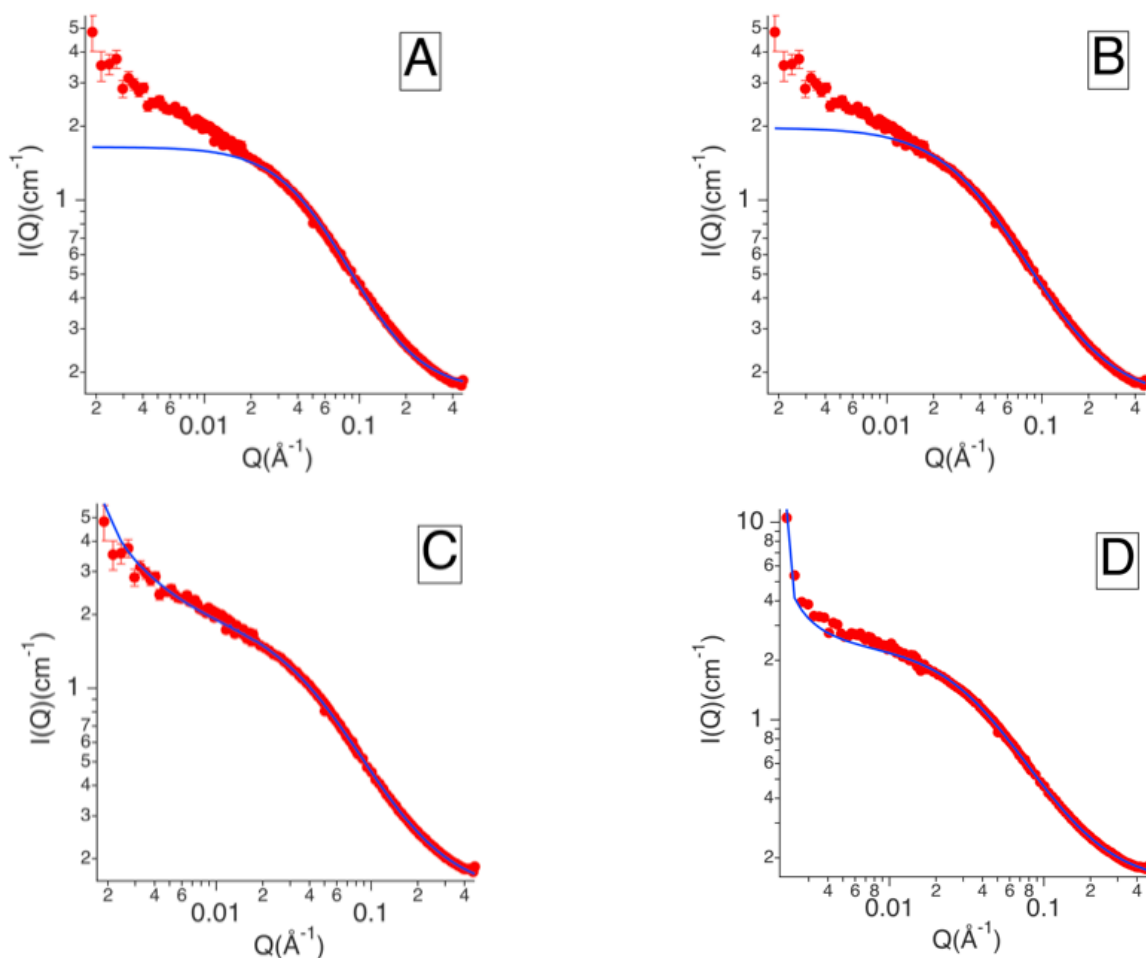

Figure S. 7: A: Ornstein Zernike fit with  $m=2$ , no clustering term

B: modified fit equation with  $m=1.7$ , according to Rubinstein and Colby for semi dilute polymers in good solvent  
 C: correlation length fit with  $m=1.7$  and a low Q exponent of  $n=1.2\pm 0.002$  indicating clustering within the PNIPAM solution as described by Hammouda et al. (**J. Chem. Phys.** **133**, 084901 (2010))

—> low exponent, no scattering from an interface as in Porod scattering ( $1/q^4$ ), but structural inhomogeneities in the semi dilute solution on larger length scales at low Q's

D: data at 20°C: correlation length fit with  $m=1.7$  and a low Q exponent of  $n=2.0 \pm 0.01$  indicating clustering within the PNIPAM solution as described by Hammouda et al. The scattering intensity seems to be increased compared to 15°C (10 vs. 5) and the clustering exponent is higher.

|            | A             | B              | C              | D              |
|------------|---------------|----------------|----------------|----------------|
| m          | 2             | $1.7\pm 0.001$ | $1.7\pm 0.001$ | $1.7\pm 0.001$ |
| n          |               |                | $1.2\pm 0.002$ | $2.1\pm 0.01$  |
| $\xi$ (nm) | $2.1\pm 0.03$ | $2.7\pm 0.03$  | $2.4\pm 0.02$  | $2.9\pm 0.01$  |

Figure 7.A-C displays data at 15°C and Figure 7.D at 20°C. As described by Hore and Hammouda we also observe that the low-Q feature becomes steeper with increasing temperature.

However, for our purposes we are concerned with the intermediate and high-Q region, which give us information about the correlation length  $\xi$ . As can be seen in the table the values for  $\xi$  are similar independent of the chosen fit (between 2.1 and 2.9) with an average value of 2.5 nm and a standard deviation of 0.35 nm.

The exponent  $m=1.7$  was used as suggested by Rubinstein and Colby for polymers in good solvent. (M. Rubinstein, R. H. Colby, *Polymer Physics*, Oxford University Press, New York, 2003, pp. 189-190.)

Since water is a good solvent for PNIPAM below the LCST of 32°C and we measured at 15°C and 20°C, this assumption is valid for our data.
